# Supplementary material for: Stretchable and self-healable electrical sensors with fingertip-like perception capability for surface texture discerning and biosignal monitoring
Source: Royal Society of Chemistry journal article supplement (doi:10.1039/c9tc02575h), 2019-01-01
Supplement: c9tc02575h1.pdf [file c9tc02575h1.pdf]

Electronic Supporting Information (ESI) for  
**Stretchable and Self-healable Electrical Sensor with Fingertip-  
Like Perception Capability for Surface Texture Discerning and  
Biosignal Monitoring**

<sup>a</sup> State Key Laboratory of Solid Lubrication, Lanzhou Institute of Chemical Physics,  
Chinese Academy of Sciences, Lanzhou 730000, China

<sup>b</sup> Center of Materials Science and Optoelectronics Engineering, University of Chinese  
Academy of Sciences, Beijing 100049, China.

**Synthesis of P-TDI-IP polymer.** Polytetramethylene glycol (abbreviated as P, 18 g, 18.0 mmol) was put into a three-necked flask at 80 °C for 3 h to remove any moisture. A mixture solution of DMAc (10 mL) with TDI (6.77 g, 30.45 mmol), IP (2.00 g, 9 mmol), and DBTDL (0.78 g, 4.5 mmol) was added dropwise into the flask under argon atmosphere. The resulting mixture was stirred for 2 h, and viscous liquid was finally obtained. Molecular weights ( $M_w = 80,400$ ;  $M_n = 50,600$  ( $\bar{D} = 1.6$ )) were determined according to gel permeation chromatography (GPC); and molecular structures were ascertained by  $^1\text{H}$  NMR (400 MHz,  $\text{CDCl}_3$ ):  $\delta$  7.33 (d,  $J = 8.0$  Hz, 4H), 6.97 (d,  $J = 8.0$  Hz, 4H), 3.77 (s, 2H), 0.01 (b, 1325H).

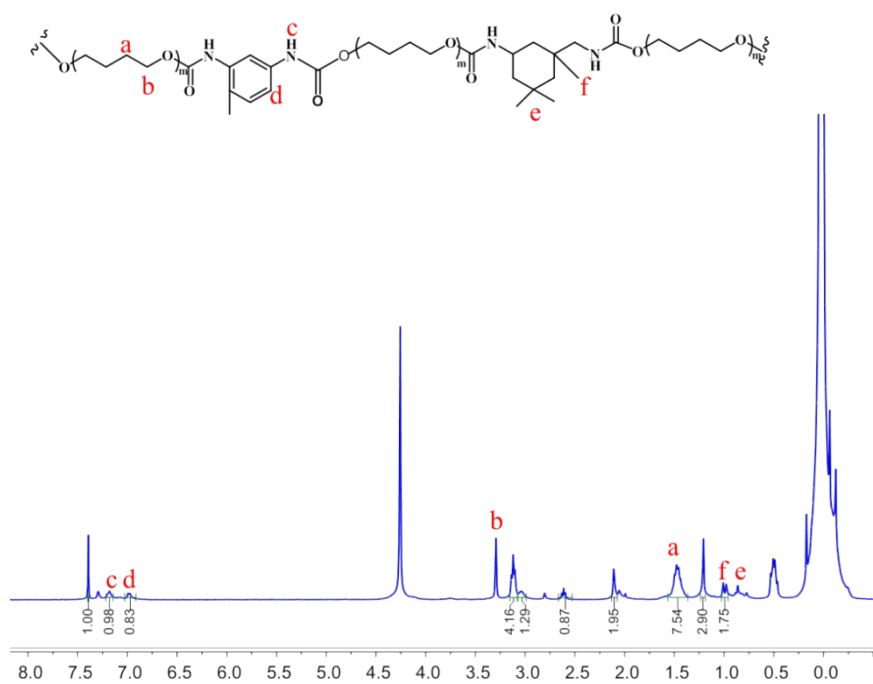

$^1\text{H}$  NMR spectrum of P-TDI-IP in  $\text{CDCl}_3$ .

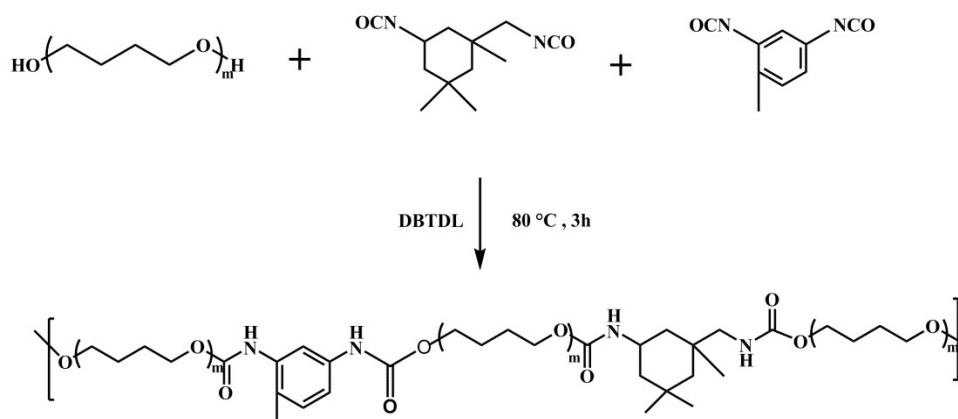

**Figure S1.** Synthesis of the P-TDI-IP polymer.

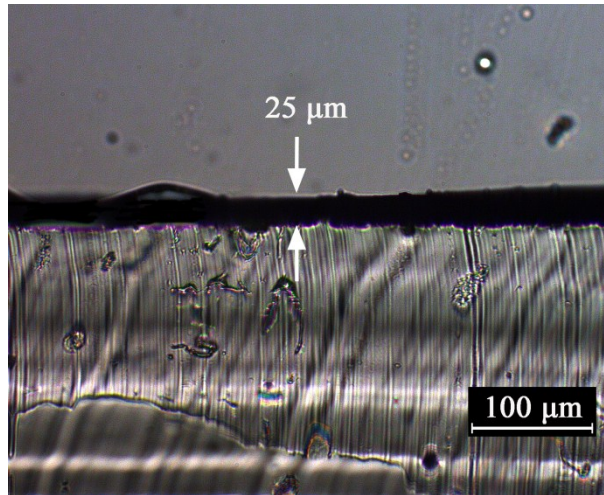

**Figure S2.** Optical microscopy images of Au-deposited P-TDI-IP elastomer substrates

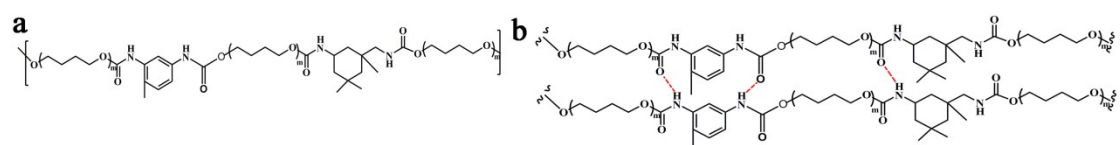

**Figure S3.** (a) Molecular structure of P-TDI-IP. (b) The P-TDI-IP polymer networks cross-linked by dynamic hydrogen bond.

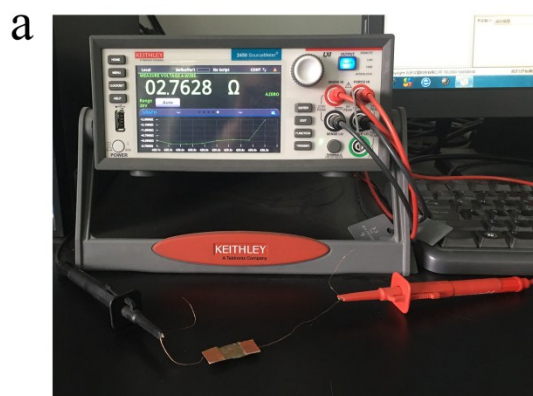

Original electronic sensor

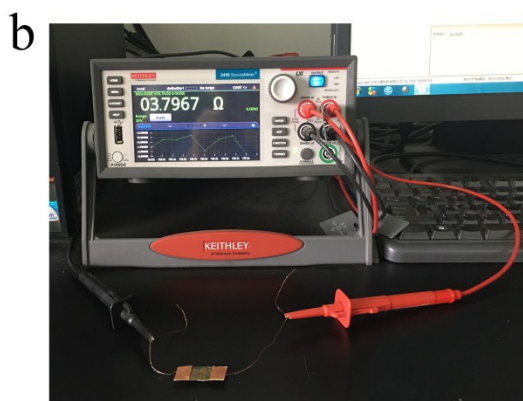

Healed electronic sensor

**Figure S4.** The resistance of electronic sensor (a) before and (b) after Healing.

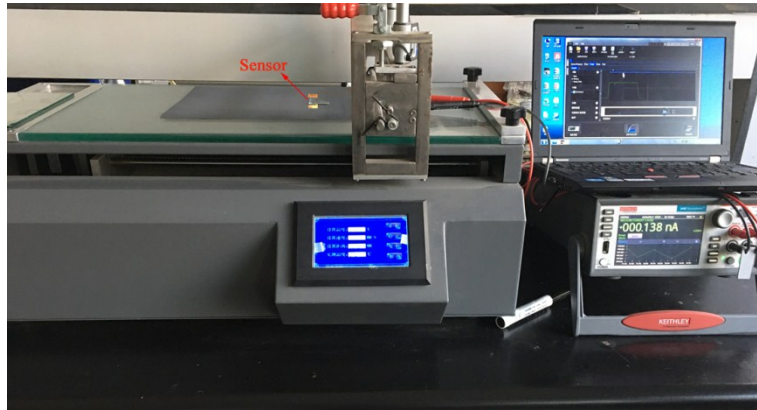

**Figure S5.**Optical photos of surface texture detection system
